# Supplementary material for: Epigenetic mutation load is weakly correlated with epigenetic age acceleration
Source: publisher site journal article supplement (doi:10.18632/aging.103950), 2020-09-29
Supplement: Supplementary file [file aging-v12i18-103950-supplementary-material-SD2.pdf]

## SUPPLEMENTARY TABLES

Supplementary Table 1. Distribution of EML for each dataset.

|                    | FHS (450K) | WHI (450K) | JHS (EPIC) | PEG1 (450K) |
|--------------------|------------|------------|------------|-------------|
| min(EML)           | 264        | 213        | 1194       | 603         |
| max(EML)           | 52783      | 43768      | 56691      | 11645       |
| mean(EML)          | 2433       | 1647       | 3401       | 2137        |
| sd(EML)            | 4183       | 3937       | 4512       | 1953        |
| % of probes as SEM | 86%        | 85%        | 77%        | 45%         |

Supplementary Table 2. Biweight midcorrelation analysis of EML.

| Outcome = log(EML) **            | Meta * |              | FHS (n = 2326) |          | WHI (n= 2091) |          | JHS (n= 1734) |          | PEG 1 (n = 237) |          |
|----------------------------------|--------|--------------|----------------|----------|---------------|----------|---------------|----------|-----------------|----------|
|                                  | Meta r | Meta P_value | Bicor r        | P_value  | Bicor r       | P_value  | Bicor r       | P_value  | Bicor r         | P_value  |
| Age                              | 0.171  | 1.64E-42     | 0.244          | 7.15E-33 | 0.104         | 1.73E-06 | 0.145         | 1.50E-09 | 0.176           | 6.45E-03 |
| BMI                              | 0.005  | 7.94E-01     | 0.017          | 4.23E-01 | -0.009        | 6.91E-01 |               |          |                 |          |
| DNAm Age Acceleration            |        |              |                |          |               |          |               |          |                 |          |
| AgeAccelHorvath                  | 0.109  | 3.25E-18     | 0.106          | 3.11E-07 | 0.140         | 1.34E-10 | 0.079         | 9.68E-04 | 0.071           | 2.75E-01 |
| IEAA                             | 0.112  | 4.04E-19     | 0.109          | 1.26E-07 | 0.144         | 3.85E-11 | 0.080         | 8.50E-04 | 0.073           | 2.63E-01 |
| EEAA (Unadjusted for cell types) | 0.236  | 5.82E-79     | 0.297          | 1.12E-48 | 0.212         | 1.31E-22 | 0.166         | 3.09E-12 | 0.211           | 1.05E-03 |
| AgeAccelHannum                   | 0.179  | 2.43E-46     | 0.225          | 4.12E-28 | 0.156         | 6.55E-13 | 0.148         | 6.33E-10 | 0.095           | 1.46E-01 |
| AgeAccelGrim                     | 0.162  | 2.25E-38     | 0.173          | 3.74E-17 | 0.180         | 9.91E-17 | 0.111         | 3.46E-06 | 0.224           | 5.23E-04 |
| DNAmADMAAdjAge                   | 0.068  | 4.75E-08     | 0.121          | 4.58E-09 | 0.070         | 1.41E-03 | -0.017        | 4.71E-01 | 0.157           | 1.58E-02 |
| DNAmB2MAAdjAge                   | 0.143  | 3.47E-30     | 0.189          | 4.69E-20 | 0.129         | 3.44E-09 | 0.074         | 2.05E-03 | 0.287           | 7.20E-06 |
| DNAmCystatinCAdjAge              | 0.153  | 3.02E-34     | 0.119          | 8.71E-09 | 0.241         | 6.48E-29 | 0.081         | 7.30E-04 | 0.183           | 4.64E-03 |
| DNAmGDF15AdjAge                  | 0.148  | 3.64E-32     | 0.167          | 6.09E-16 | 0.127         | 5.80E-09 | 0.142         | 3.01E-09 | 0.162           | 1.27E-02 |
| DNAmLeptinAdjAge                 | -0.025 | 4.65E-02     | -0.021         | 3.19E-01 | -0.035        | 1.11E-01 | -0.031        | 2.03E-01 | 0.063           | 3.34E-01 |
| DNAmPACKYRSAdjAge                | 0.161  | 8.96E-38     | 0.166          | 7.99E-16 | 0.172         | 2.23E-15 | 0.137         | 1.10E-08 | 0.150           | 2.13E-02 |
| DNAmPAI1AdjAge                   | 0.031  | 1.47E-02     | 0.024          | 2.49E-01 | -0.004        | 8.59E-01 | 0.061         | 1.07E-02 | 0.173           | 7.56E-03 |
| DNAmTIMP1AdjAge                  | 0.028  | 2.35E-02     | 0.070          | 7.04E-04 | 0.010         | 6.41E-01 | -0.001        | 9.72E-01 | -0.010          | 8.80E-01 |
| AgeAccelPheno                    | 0.123  | 7.28E-23     | 0.178          | 4.45E-18 | 0.106         | 1.13E-06 | 0.078         | 1.20E-03 | 0.042           | 5.22E-01 |
| DNAmTLAdjAge                     | -0.065 | 1.91E-07     | -0.080         | 1.17E-04 | -0.033        | 1.36E-01 | -0.082        | 6.05E-04 | -0.082          | 2.11E-01 |
| DNAmAgeSkinBloodClockAdjAge      | 0.047  | 1.93E-04     | 0.102          | 8.32E-07 | 0.022         | 3.17E-01 | 0.019         | 4.27E-01 | -0.080          | 2.22E-01 |

Biweight midcorrelation analyses of EML with chronological age, BMI, AgeAccelHorvath, IEAA, extrinsic epigenetic age acceleration (EEAA) derived from the Hannum clock by up-weighting the contribution of age-related blood cell counts, AgeAccelHannum, AgeAccelGrim, age adjusted DNAm-based surrogate markers of adrenomedullin (DNAmADMAAdjAge), beta-2 microglobulin (DNAmB2MAAdjAge), cystatin C (DNAmCystatinCAdjAge), growth differentiation factor 15 (DNAmGDF15AdjAge), leptin (DNAmLeptinAdjAge), plasminogen activation inhibitor 1 (DNAmPAI1AdjAge), tissue inhibitor metalloproteinase 1 (DNAmTIMP1AdjAge), smoking pack-years (DNAmPACKYRSAdjAge), AgeAccelPheno, age adjusted DNAm-based surrogate markers of telomere length (DNAmTLAdjAge), and age adjusted SkinBlood clock.

\* Meta-analysis using Stouffer's method with weights given by the square root of the number of (non-missing) samples in each data set.

\*\* All analyses except EEAA were adjusted for Age, Sex, Race/ethnicity, Cell types; EEAA was not adjusted for cell types.

**Supplementary Table 3. Biweight midcorrelation analysis of EML in FHS, stratified by the direction of acceleration.**

| Outcome = log(EML) *             | Acceleration |          | Deceleration |          |
|----------------------------------|--------------|----------|--------------|----------|
|                                  | Bicor r      | P_value  | Bicor r      | P_value  |
| AgeAccelHorvath                  | 0.178        | 3.81E-09 | -0.039       | 1.71E-01 |
| IEAA                             | 0.150        | 4.09E-07 | -0.064       | 2.66E-02 |
| EEAA (Unadjusted for cell types) | 0.299        | 4.74E-25 | 0.089        | 2.20E-03 |
| AgeAccelHannum                   | 0.239        | 3.96E-16 | 0.085        | 3.12E-03 |
| AgeAccelGrim                     | 0.136        | 1.64E-05 | 0.060        | 2.77E-02 |
| DNAmADMAdjAge                    | 0.149        | 5.88E-07 | 0.029        | 3.14E-01 |
| DNAmB2MAdjAge                    | 0.130        | 1.90E-05 | 0.070        | 1.34E-02 |
| DNAmCystatinCAdjAge              | 0.135        | 8.79E-06 | -0.026       | 3.54E-01 |
| DNAmGDF15AdjAge                  | 0.149        | 1.61E-06 | 0.078        | 4.90E-03 |
| DNAmLeptinAdjAge                 | 0.015        | 6.04E-01 | 0.068        | 2.26E-02 |
| DNAmPACKYRSAdjAge                | 0.077        | 2.43E-02 | 0.049        | 6.15E-02 |
| DNAmPAI1AdjAge                   | 0.075        | 1.33E-02 | -0.035       | 2.25E-01 |
| DNAmTIMP1AdjAge                  | 0.092        | 2.17E-03 | -0.058       | 4.30E-02 |
| AgeAccelPheno                    | 0.206        | 4.49E-12 | 0.036        | 2.08E-01 |
| DNAmTLAdjAge                     | 0.064        | 2.51E-02 | -0.127       | 2.27E-05 |
| DNAmAgeSkinBloodClockAdjAge      | 0.168        | 1.40E-08 | -0.023       | 4.17E-01 |

\* Adjusted for Age, Sex, Cell types.

**Supplementary Table 4. Stratification analysis: biweight midcorrelation analysis of EML, stratified by sex.**

| Outcome = log(EML) *             | PEG 1          |          | FHS              |          |                 |          | WHI               |          | JHS               |          |                |          |                   |          |
|----------------------------------|----------------|----------|------------------|----------|-----------------|----------|-------------------|----------|-------------------|----------|----------------|----------|-------------------|----------|
|                                  | Male (n = 126) |          | Female (n = 111) |          | Male (n = 1077) |          | Female (n = 1249) |          | Female (n = 2091) |          | Male (n = 648) |          | Female (n = 1086) |          |
|                                  | Bicor r        | P_value  | Bicor r          | P_value  | Bicor r         | P_value  | Bicor r           | P_value  | Bicor r           | P_value  | Bicor r        | P_value  | Bicor r           | P_value  |
| Age                              | 0.201          | 2.40E-02 | 0.200            | 3.53E-02 | 0.225           | 7.53E-14 | 0.259             | 1.54E-20 | 0.104             | 1.73E-06 | 0.134          | 5.98E-04 | 0.150             | 7.24E-07 |
| BMI                              |                |          |                  |          | 0.026           | 3.90E-01 | 0.025             | 3.75E-01 | -0.009            | 6.91E-01 |                |          |                   |          |
| DNAm Age Acceleration            |                |          |                  |          |                 |          |                   |          |                   |          |                |          |                   |          |
| AgeAccelHorvath                  | 0.105          | 2.43E-01 | 0.041            | 6.71E-01 | 0.086           | 4.69E-03 | 0.126             | 7.67E-06 | 0.140             | 1.34E-10 | 0.068          | 8.27E-02 | 0.082             | 6.87E-03 |
| IEAA                             | 0.110          | 2.21E-01 | 0.033            | 7.32E-01 | 0.108           | 4.02E-04 | 0.116             | 4.06E-05 | 0.144             | 3.85E-11 | 0.076          | 5.19E-02 | 0.086             | 4.63E-03 |
| EEAA (Unadjusted for cell types) | 0.205          | 2.13E-02 | 0.245            | 9.45E-03 | 0.305           | 1.27E-24 | 0.315             | 3.35E-30 | 0.212             | 1.31E-22 | 0.180          | 4.20E-06 | 0.155             | 2.90E-07 |
| AgeAccelHannum                   | 0.080          | 3.73E-01 | 0.106            | 2.66E-01 | 0.215           | 9.77E-13 | 0.257             | 3.02E-20 | 0.156             | 6.55E-13 | 0.158          | 5.16E-05 | 0.144             | 2.05E-06 |
| AgeAccelGrim                     | 0.192          | 3.13E-02 | 0.299            | 1.43E-03 | 0.218           | 4.20E-13 | 0.167             | 2.71E-09 | 0.180             | 9.91E-17 | 0.082          | 3.79E-02 | 0.134             | 9.43E-06 |
| DNAmADMAdjAge                    | 0.100          | 2.67E-01 | 0.223            | 1.88E-02 | 0.207           | 6.85E-12 | 0.091             | 1.35E-03 | 0.070             | 1.41E-03 | -0.024         | 5.37E-01 | 0.011             | 7.06E-01 |
| DNAmB2MAdjAge                    | 0.300          | 6.40E-04 | 0.230            | 1.50E-02 | 0.238           | 2.16E-15 | 0.147             | 1.94E-07 | 0.129             | 3.44E-09 | 0.063          | 1.08E-01 | 0.077             | 1.13E-02 |
| DNAmCystatinCAdjAge              | 0.195          | 2.86E-02 | 0.187            | 4.89E-02 | 0.181           | 2.42E-09 | 0.075             | 7.81E-03 | 0.241             | 6.48E-29 | 0.039          | 3.25E-01 | 0.105             | 5.43E-04 |
| DNAmGDF15AdjAge                  | 0.129          | 1.49E-01 | 0.172            | 7.03E-02 | 0.211           | 2.85E-12 | 0.134             | 2.06E-06 | 0.127             | 5.80E-09 | 0.097          | 1.37E-02 | 0.167             | 2.91E-08 |
| DNAmLeptinAdjAge                 | -0.073         | 4.19E-01 | 0.138            | 1.49E-01 | 0.071           | 1.94E-02 | -0.037            | 1.89E-01 | -0.035            | 1.11E-01 | 0.043          | 2.75E-01 | 0.046             | 1.27E-01 |
| DNAmPACKYRSAdjAge                | 0.184          | 3.89E-02 | 0.120            | 2.10E-01 | 0.161           | 1.06E-07 | 0.179             | 2.09E-10 | 0.172             | 2.23E-15 | 0.113          | 4.05E-03 | 0.147             | 1.19E-06 |
| DNAmPAI1AdjAge                   | 0.026          | 7.70E-01 | 0.362            | 9.25E-05 | 0.028           | 3.66E-01 | 0.039             | 1.65E-01 | -0.004            | 8.59E-01 | 0.053          | 1.76E-01 | 0.065             | 3.21E-02 |
| DNAmTIMP1AdjAge                  | -0.038         | 6.72E-01 | 0.031            | 7.50E-01 | 0.100           | 1.07E-03 | 0.060             | 3.41E-02 | 0.010             | 6.41E-01 | -0.031         | 4.27E-01 | 0.016             | 5.97E-01 |
| AgeAccelPheno                    | 0.123          | 1.68E-01 | -0.080           | 4.02E-01 | 0.211           | 2.66E-12 | 0.152             | 6.90E-08 | 0.106             | 1.13E-06 | 0.079          | 4.47E-02 | 0.080             | 8.40E-03 |
| DNAmTLAdjAge                     | -0.052         | 5.64E-01 | -0.166           | 8.26E-02 | -0.061          | 4.61E-02 | -0.101            | 3.63E-04 | -0.033            | 1.36E-01 | -0.088         | 2.56E-02 | -0.069            | 2.21E-02 |
| DNAmAgeSkinBloodClockAdjAge      | -0.029         | 7.45E-01 | -0.141           | 1.40E-01 | 0.105           | 5.37E-04 | 0.102             | 2.90E-04 | 0.022             | 3.17E-01 | -0.010         | 7.99E-01 | 0.032             | 2.88E-01 |
| Cell types                       |                |          |                  |          |                 |          |                   |          |                   |          |                |          |                   |          |

|                      |        |          |        |          |        |          |        |          |        |          |        |          |        |          |
|----------------------|--------|----------|--------|----------|--------|----------|--------|----------|--------|----------|--------|----------|--------|----------|
| CD8.naive            | 0.043  | 6.32E-01 | 0.044  | 6.47E-01 | -0.076 | 1.27E-02 | -0.068 | 1.62E-02 | 0.020  | 3.66E-01 | -0.008 | 8.30E-01 | -0.010 | 7.32E-01 |
| CD8pCD28nCD45R<br>An | 0.018  | 8.44E-01 | 0.179  | 6.00E-02 | 0.076  | 1.26E-02 | 0.096  | 7.00E-04 | 0.086  | 8.16E-05 | 0.068  | 8.43E-02 | 0.030  | 3.28E-01 |
| PlasmaBlast          | -0.089 | 3.19E-01 | -0.125 | 1.92E-01 | -0.012 | 6.90E-01 | -0.088 | 1.81E-03 | -0.070 | 1.39E-03 | -0.148 | 1.60E-04 | -0.139 | 4.57E-06 |
| CD4T                 | -0.134 | 1.35E-01 | -0.133 | 1.65E-01 | -0.150 | 7.97E-07 | -0.143 | 4.03E-07 | -0.113 | 2.17E-07 | -0.049 | 2.17E-01 | -0.120 | 7.55E-05 |
| Gran                 | -0.182 | 4.18E-02 | -0.128 | 1.80E-01 | -0.065 | 3.37E-02 | -0.084 | 2.81E-03 | -0.016 | 4.74E-01 | -0.065 | 9.80E-02 | -0.111 | 2.57E-04 |

\* All analyses except EEAA were adjusted for Age, Sex, Race/ethnicity, Cell types; EEAA was not adjusted for cell types.

**Supplementary Table 5. Sensitivity analysis: biweight midcorrelation analysis of EML, additionally adjusted for age<sup>2</sup>.**

| Outcome = log(EML)               | PEG 1 (n = 237) |          |            |          | FHS (n = 2326) |          |            |          | WHI (n= 2091) |          |            |          | JHS (n= 1734) |          |            |          |
|----------------------------------|-----------------|----------|------------|----------|----------------|----------|------------|----------|---------------|----------|------------|----------|---------------|----------|------------|----------|
|                                  | Model 1 *       |          | Model 2 ** |          | Model 1 *      |          | Model 2 ** |          | Model 1 *     |          | Model 2 ** |          | Model 1 *     |          | Model 2 ** |          |
|                                  | Bicor r         | P_value  | Bicor r    | P_value  | Bicor r        | P_value  | Bicor r    | P_value  | Bicor r       | P_value  | Bicor r    | P_value  | Bicor r       | P_value  | Bicor r    | P_value  |
| AgeAccelHorvath                  | 0.071           | 2.75E-01 | 0.089      | 1.72E-01 | 0.106          | 3.11E-07 | 0.106      | 3.08E-07 | 0.140         | 1.34E-10 | 0.141      | 9.63E-11 | 0.079         | 9.68E-04 | 0.100      | 2.84E-05 |
| IEAA                             | 0.073           | 2.63E-01 | 0.091      | 1.61E-01 | 0.109          | 1.26E-07 | 0.109      | 1.23E-07 | 0.144         | 3.85E-11 | 0.144      | 3.19E-11 | 0.080         | 8.50E-04 | 0.102      | 2.18E-05 |
| EEAA (Unadjusted for cell types) | 0.211           | 1.05E-03 | 0.225      | 4.80E-04 | 0.297          | 1.12E-48 | 0.298      | 7.40E-49 | 0.212         | 1.31E-22 | 0.210      | 2.35E-22 | 0.166         | 3.09E-12 | 0.168      | 2.13E-12 |
| AgeAccelHannum                   | 0.095           | 1.46E-01 | 0.111      | 8.81E-02 | 0.225          | 4.12E-28 | 0.225      | 3.79E-28 | 0.156         | 6.55E-13 | 0.156      | 8.30E-13 | 0.148         | 6.33E-10 | 0.158      | 3.69E-11 |
| AgeAccelGrim                     | 0.224           | 5.23E-04 | 0.219      | 7.01E-04 | 0.173          | 3.74E-17 | 0.173      | 3.87E-17 | 0.180         | 9.91E-17 | 0.180      | 1.09E-16 | 0.111         | 3.46E-06 | 0.118      | 8.87E-07 |
| DNAmADMAdjAge                    | 0.157           | 1.58E-02 | 0.156      | 1.63E-02 | 0.121          | 4.58E-09 | 0.121      | 4.65E-09 | 0.070         | 1.41E-03 | 0.069      | 1.56E-03 | -0.017        | 4.71E-01 | -0.019     | 4.34E-01 |
| DNAmB2MAdjAge                    | 0.287           | 7.20E-06 | 0.288      | 6.61E-06 | 0.189          | 4.69E-20 | 0.188      | 4.84E-20 | 0.129         | 3.44E-09 | 0.128      | 4.33E-09 | 0.074         | 2.05E-03 | 0.072      | 2.75E-03 |
| DNAmCystatinCAdjAge              | 0.183           | 4.64E-03 | 0.182      | 4.96E-03 | 0.119          | 8.71E-09 | 0.119      | 8.84E-09 | 0.241         | 6.48E-29 | 0.240      | 6.64E-29 | 0.081         | 7.30E-04 | 0.075      | 1.69E-03 |
| DNAmGDF15AdjAge                  | 0.162           | 1.27E-02 | 0.162      | 1.26E-02 | 0.167          | 6.09E-16 | 0.167      | 6.12E-16 | 0.127         | 5.80E-09 | 0.126      | 7.40E-09 | 0.142         | 3.01E-09 | 0.143      | 2.11E-09 |
| DNAmLeptinAdjAge                 | 0.063           | 3.34E-01 | 0.061      | 3.46E-01 | -0.021         | 3.19E-01 | -0.021     | 3.23E-01 | -0.035        | 1.11E-01 | -0.034     | 1.20E-01 | -0.031        | 2.03E-01 | -0.031     | 2.02E-01 |
| DNAmPACKYRSAdjAge                | 0.150           | 2.13E-02 | 0.144      | 2.64E-02 | 0.166          | 7.99E-16 | 0.166      | 8.60E-16 | 0.172         | 2.23E-15 | 0.173      | 1.67E-15 | 0.137         | 1.10E-08 | 0.148      | 6.41E-10 |
| DNAmPAI1AdjAge                   | 0.173           | 7.56E-03 | 0.170      | 8.84E-03 | 0.024          | 2.49E-01 | 0.024      | 2.48E-01 | -0.004        | 8.59E-01 | -0.001     | 9.57E-01 | 0.061         | 1.07E-02 | 0.067      | 5.03E-03 |
| DNAmTIMP1AdjAge                  | -0.010          | 8.80E-01 | -0.008     | 9.08E-01 | 0.070          | 7.04E-04 | 0.070      | 7.11E-04 | 0.010         | 6.41E-01 | 0.008      | 7.01E-01 | -0.001        | 9.72E-01 | -0.002     | 9.42E-01 |
| AgeAccelPheno                    | 0.042           | 5.22E-01 | 0.051      | 4.36E-01 | 0.178          | 4.45E-18 | 0.178      | 4.22E-18 | 0.106         | 1.13E-06 | 0.107      | 9.47E-07 | 0.078         | 1.20E-03 | 0.083      | 5.33E-04 |
| DNAmTLAAdjAge                    | -0.082          | 2.11E-01 | -0.087     | 1.84E-01 | -0.080         | 1.17E-04 | -0.080     | 1.16E-04 | -0.033        | 1.36E-01 | -0.033     | 1.30E-01 | -0.082        | 6.05E-04 | -0.093     | 1.08E-04 |
| DNAmAgeSkinBloodClockAdj<br>Age  | -0.080          | 2.22E-01 | -0.045     | 4.91E-01 | 0.102          | 8.32E-07 | 0.102      | 7.97E-07 | 0.022         | 3.17E-01 | 0.024      | 2.79E-01 | 0.019         | 4.27E-01 | 0.047      | 5.25E-02 |

\* Adjusted (Age, Sex, Race/ethnicity, Cell types)

\*\* Adjusted (Age, Age2, Sex, Race/ethnicity, Cell types)

**Supplementary Table 6. Sensitivity analysis: biweight midcorrelation analysis of EML, additionally adjusted for BMI.**

| Outcome = log(EML)               | FHS (n = 2326) |          |            |          | WHI (n= 2091) |          |            |          |
|----------------------------------|----------------|----------|------------|----------|---------------|----------|------------|----------|
|                                  | Model 1 *      |          | Model 2 ** |          | Model 1 *     |          | Model 2 ** |          |
|                                  | Bicor r        | P_value  | Bicor r    | P_value  | Bicor r       | P_value  | Bicor r    | P_value  |
| AgeAccelHorvath                  | 0.106          | 3.11E-07 | 0.110      | 1.16E-07 | 0.140         | 1.34E-10 | 0.144      | 4.13E-11 |
| IEAA                             | 0.109          | 1.26E-07 | 0.113      | 4.37E-08 | 0.144         | 3.85E-11 | 0.148      | 1.36E-11 |
| EEAA (Unadjusted for cell types) | 0.297          | 1.12E-48 | 0.298      | 1.29E-48 | 0.212         | 1.31E-22 | 0.216      | 2.92E-23 |
| AgeAccelHannum                   | 0.225          | 4.12E-28 | 0.226      | 3.19E-28 | 0.156         | 6.55E-13 | 0.157      | 5.85E-13 |
| AgeAccelGrim                     | 0.173          | 3.74E-17 | 0.172      | 8.56E-17 | 0.180         | 9.91E-17 | 0.181      | 1.02E-16 |
| DNAmADMAdjAge                    | 0.121          | 4.58E-09 | 0.123      | 2.93E-09 | 0.070         | 1.41E-03 | 0.074      | 7.79E-04 |
| DNAmB2MAdjAge                    | 0.189          | 4.69E-20 | 0.190      | 2.84E-20 | 0.129         | 3.44E-09 | 0.130      | 2.44E-09 |
| DNAmCystatinCAdjAge              | 0.119          | 8.71E-09 | 0.117      | 1.51E-08 | 0.241         | 6.48E-29 | 0.244      | 1.31E-29 |
| DNAmGDF15AdjAge                  | 0.167          | 6.09E-16 | 0.165      | 1.37E-15 | 0.127         | 5.80E-09 | 0.127      | 7.21E-09 |
| DNAmLeptinAdjAge                 | -0.021         | 3.19E-01 | -0.021     | 3.21E-01 | -0.035        | 1.11E-01 | -0.029     | 1.93E-01 |
| DNAmPACKYRSAdjAge                | 0.166          | 7.99E-16 | 0.164      | 1.88E-15 | 0.172         | 2.23E-15 | 0.169      | 1.09E-14 |
| DNAmPAI1AdjAge                   | 0.024          | 2.49E-01 | 0.021      | 3.16E-01 | -0.004        | 8.59E-01 | 0.007      | 7.34E-01 |
| DNAmTIMP1AdjAge                  | 0.070          | 7.04E-04 | 0.068      | 1.03E-03 | 0.010         | 6.41E-01 | 0.016      | 4.71E-01 |

|                             |        |          |        |          |        |          |        |          |
|-----------------------------|--------|----------|--------|----------|--------|----------|--------|----------|
| AgeAccelPheno               | 0.178  | 4.45E-18 | 0.180  | 2.10E-18 | 0.106  | 1.13E-06 | 0.111  | 4.26E-07 |
| DNAmTLAdjAge                | -0.080 | 1.17E-04 | -0.079 | 1.47E-04 | -0.033 | 1.36E-01 | -0.033 | 1.35E-01 |
| DNAmAgeSkinBloodClockAdjAge | 0.102  | 8.32E-07 | 0.104  | 5.72E-07 | 0.022  | 3.17E-01 | 0.024  | 2.71E-01 |

\* Adjusted (Age, Sex, Race/ethnicity, Cell types)

\*\* Adjusted (Age, Sex, Race/ethnicity, Cell types, BMI)

**Supplementary Table 7. Sensitivity analysis: Biweight midcorrelation analysis of EML in FHS using different SEM cutoffs in FHS.**

| Outcome = log(EML) *             | EML (3IQR) |          | EML (2IQR) ** |          | EML (4IQR) *** |          |
|----------------------------------|------------|----------|---------------|----------|----------------|----------|
|                                  | Bicor r    | P_value  | Bicor r       | P_value  | Bicor r        | P_value  |
| Age                              | 0.244      | 7.15E-33 | 0.223         | 1.02E-27 | 0.247          | 1.13E-33 |
| BMI                              | 0.017      | 4.23E-01 | 0.006         | 7.60E-01 | 0.019          | 3.49E-01 |
| DNAm Age Acceleration            |            |          |               |          |                |          |
| AgeAccelHorvath                  | 0.106      | 3.11E-07 | 0.073         | 4.38E-04 | 0.112          | 5.44E-08 |
| IEAA                             | 0.109      | 1.26E-07 | 0.077         | 2.00E-04 | 0.135          | 5.28E-11 |
| EEAA (Unadjusted for cell types) | 0.297      | 1.12E-48 | 0.281         | 1.89E-43 | 0.293          | 2.46E-47 |
| AgeAccelHannum                   | 0.225      | 4.12E-28 | 0.224         | 5.97E-28 | 0.204          | 1.98E-23 |
| AgeAccelGrim                     | 0.173      | 3.74E-17 | 0.147         | 1.03E-12 | 0.180          | 1.75E-18 |
| DNAmADMAdjAge                    | 0.121      | 4.58E-09 | 0.084         | 4.41E-05 | 0.133          | 1.31E-10 |
| DNAmB2MAdjAge                    | 0.189      | 4.69E-20 | 0.178         | 3.79E-18 | 0.180          | 2.28E-18 |
| DNAmCystatinCAdjAge              | 0.119      | 8.71E-09 | 0.116         | 2.03E-08 | 0.111          | 6.85E-08 |
| DNAmGDF15AdjAge                  | 0.167      | 6.09E-16 | 0.157         | 2.52E-14 | 0.161          | 4.38E-15 |
| DNAmLeptinAdjAge                 | -0.021     | 3.19E-01 | -0.019        | 3.62E-01 | -0.027         | 1.97E-01 |
| DNAmPACKYRSAdjAge                | 0.166      | 7.99E-16 | 0.142         | 5.64E-12 | 0.176          | 1.05E-17 |
| DNAmPAI1AdjAge                   | 0.024      | 2.49E-01 | 0.005         | 8.17E-01 | 0.037          | 7.75E-02 |
| DNAmTIMP1AdjAge                  | 0.070      | 7.04E-04 | 0.068         | 9.46E-04 | 0.071          | 6.02E-04 |
| AgeAccelPheno                    | 0.178      | 4.45E-18 | 0.173         | 3.96E-17 | 0.164          | 1.37E-15 |
| DNAmTLAdjAge                     | -0.080     | 1.17E-04 | -0.068        | 1.04E-03 | -0.073         | 4.37E-04 |
| DNAmAgeSkinBloodClockAdjAge      | 0.102      | 8.32E-07 | 0.072         | 5.20E-04 | 0.116          | 1.77E-08 |
| Cell types                       |            |          |               |          |                |          |
| CD8.naive                        | -0.072     | 5.20E-04 | -0.038        | 6.97E-02 | -0.084         | 4.77E-05 |
| CD8pCD28nCD45RAn                 | 0.085      | 3.90E-05 | 0.112         | 6.64E-08 | 0.038          | 6.37E-02 |
| PlasmaBlast                      | -0.054     | 8.94E-03 | -0.096        | 3.13E-06 | -0.021         | 3.10E-01 |
| CD4T                             | -0.146     | 1.68E-12 | -0.176        | 9.14E-18 | -0.149         | 5.34E-13 |
| Gran                             | -0.075     | 2.72E-04 | -0.074        | 3.37E-04 | -0.066         | 1.52E-03 |

\* Adjusted for age, sex, cell types.

\*\* SEMs (2IQR) were defined as DNA methylation mutations that were greater than 2 times the IQR above the upper quartile of a given CpG or less than 2 times the IQR below the lower quartile of a given CpG.

\*\*\* SEMs (4IQR) were defined as DNA methylation mutations that were greater than 4 times the IQR above the upper quartile of a given CpG or less than 4 times the IQR below the lower quartile of a given CpG.

**Supplementary Table 8. Sensitivity analysis: biweight midcorrelation analysis of EML derived from methylation data with various normalization methods (Illumina, Noob and Quantile normalization).**

| Outcome = log(EML)                                     | PEG 1 (n = 237) |          |            |          |         |          |          |          |
|--------------------------------------------------------|-----------------|----------|------------|----------|---------|----------|----------|----------|
|                                                        | Illumina        |          | Functional |          | Noob    |          | Quantile |          |
|                                                        | Bicor r         | P_value  | Bicor r    | P_value  | Bicor r | P_value  | Bicor r  | P_value  |
| <b>Adjusted (Age, Sex, Race/ethnicity, Cell types)</b> |                 |          |            |          |         |          |          |          |
| AgeAccelHorvath                                        | 0.075           | 2.49E-01 | 0.070      | 2.82E-01 | 0.077   | 2.40E-01 | 0.021    | 7.50E-01 |
| IEAA                                                   | 0.080           | 2.17E-01 | 0.067      | 3.07E-01 | 0.074   | 2.59E-01 | 0.029    | 6.55E-01 |
| AgeAccelHannum                                         | 0.109           | 9.29E-02 | 0.093      | 1.52E-01 | 0.104   | 1.10E-01 | 0.036    | 5.86E-01 |
| AgeAccelGrim                                           | 0.203           | 1.71E-03 | 0.213      | 9.69E-04 | 0.241   | 1.82E-04 | 0.134    | 3.93E-02 |
| <b>Cell types</b>                                      |                 |          |            |          |         |          |          |          |
| CD8.naive                                              | 0.070           | 2.84E-01 | 0.042      | 5.23E-01 | 0.029   | 6.52E-01 | 0.066    | 3.10E-01 |
| CD8pCD28nCD45RAn                                       | 0.063           | 3.34E-01 | 0.082      | 2.07E-01 | 0.097   | 1.36E-01 | 0.074    | 2.58E-01 |
| PlasmaBlast                                            | -0.104          | 1.11E-01 | -0.110     | 9.23E-02 | -0.111  | 8.91E-02 | -0.068   | 2.98E-01 |
| CD4T                                                   | -0.080          | 2.20E-01 | -0.118     | 6.95E-02 | -0.115  | 7.66E-02 | 0.018    | 7.85E-01 |
| Gran                                                   | -0.152          | 1.90E-02 | -0.170     | 8.67E-03 | -0.163  | 1.21E-02 | -0.013   | 8.48E-01 |

**Supplementary Table 9. SEMs enriched within clock CpGs.**

| Clock                          | FHS (n = 2326) | WHI (n= 2091) | JHS (n= 1734) | PEG 1 (n = 237) |
|--------------------------------|----------------|---------------|---------------|-----------------|
|                                | N              | N             | N             | N               |
| <b>HorvathClock (353 CpGs)</b> |                |               |               |                 |
| Significant                    | 46             | 34            | 22            | 4               |
| Non-Significant                | 2280           | 2057          | 1712          | 233             |
| <b>PhenoClock (513 CpGs)</b>   |                |               |               |                 |
| Significant                    | 151            | 97            | 121           | 19              |
| Non-Significant                | 2175           | 1994          | 1613          | 218             |
| <b>HannumClock (71 CpGs)</b>   |                |               |               |                 |
| Significant                    | 26             | 10            | 19            | 5               |
| Non-Significant                | 2300           | 2081          | 1715          | 232             |

**Supplementary Table 10. SEMs enriched within gene regions**

| Genomic region   | FHS (n = 2326) | WHI (n= 2091) | JHS (n= 1734) | PEG 1 (n = 237) |
|------------------|----------------|---------------|---------------|-----------------|
|                  | N              | N             | N             | N               |
| <b>TSS1500</b>   |                |               |               |                 |
| Significant      | 545            | 110           | 229           | 23              |
| Non-Significant  | 1781           | 1981          | 1505          | 214             |
| <b>TSS200</b>    |                |               |               |                 |
| Significant      | 908            | 385           | 372           | 142             |
| Non-Significant  | 1418           | 1706          | 1362          | 95              |
| <b>5'UTR</b>     |                |               |               |                 |
| Significant      | 213            | 71            | 64            | 8               |
| Non-Significant  | 2113           | 2020          | 1670          | 229             |
| <b>1stExon</b>   |                |               |               |                 |
| Significant      | 595            | 346           | 322           | 84              |
| Non-Significant  | 1731           | 1745          | 1412          | 153             |
| <b>Gene Body</b> |                |               |               |                 |
| Significant      | 296            | 693           | 357           | 24              |
| Non-Significant  | 2030           | 1398          | 1377          | 213             |
| <b>3'UTR</b>     |                |               |               |                 |
| Significant      | 110            | 276           | 179           | 6               |
| Non-Significant  | 2216           | 1815          | 1555          | 231             |

**Supplementary Table 11. SEMs enriched within regulatory regions.**

|                                                      | <b>JHS (n= 1734)</b> |
|------------------------------------------------------|----------------------|
| <b>Genomic region</b>                                | <b>N</b>             |
| <b>Enhancer from FANTOM5</b>                         |                      |
| Significant                                          | 54                   |
| Non-Significant                                      | 1680                 |
| <b>DNase hypersensitive from ENCODE</b>              |                      |
| Significant                                          | 284                  |
| Non-Significant                                      | 1450                 |
| <b>Open chromatin from ENCODE</b>                    |                      |
| Significant                                          | 436                  |
| Non-Significant                                      | 1298                 |
| <b>Transcription factor binding site from ENCODE</b> |                      |
| Significant                                          | 383                  |
| Non-Significant                                      | 1351                 |
| <b>Promoter from Methylation Consortium</b>          |                      |
| Significant                                          | 165                  |
| Non-Significant                                      | 1578                 |

**Supplementary Table 12. Top SEMs enriched KEGG pathways significantly associated with faster AgeAccelHorvath.**

|                       | <b>KEGG Pathway</b> | <b>Description</b>                                     | <b>Number of people with SEMs enriched</b> | <b>AgeAccel_Coef*</b> | <b>AgeAccel_Pvalue</b> |
|-----------------------|---------------------|--------------------------------------------------------|--------------------------------------------|-----------------------|------------------------|
| <b>FHS (n = 2326)</b> | hsa05165            | Human papillomavirus infection                         | 355                                        | 1.664                 | 7.62E-07               |
|                       | hsa04360            | Axon guidance                                          | 347                                        | 1.726                 | 8.53E-07               |
|                       | hsa05032            | Morphine addiction                                     | 346                                        | 2.138                 | 1.13E-11               |
|                       | hsa04713            | Circadian entrainment                                  | 341                                        | 1.796                 | 4.97E-08               |
|                       | hsa05033            | Nicotine addiction                                     | 339                                        | 2.239                 | 4.33E-13               |
|                       | hsa04510            | Focal adhesion                                         | 332                                        | 1.684                 | 1.25E-06               |
|                       | hsa04080            | Neuroactive ligand-receptor interaction                | 326                                        | 2.487                 | 2.84E-15               |
|                       | hsa04724            | Glutamatergic synapse                                  | 300                                        | 2.412                 | 7.38E-13               |
|                       | hsa04934            | Cushing syndrome                                       | 297                                        | 2.041                 | 1.15E-08               |
|                       | hsa04727            | GABAergic synapse                                      | 294                                        | 2.419                 | 7.00E-13               |
| <b>WHI (n= 2091)</b>  | hsa00053            | Ascorbate and aldarate metabolism                      | 312                                        | 0.800                 | 1.88E-02               |
|                       | hsa04514            | Cell adhesion molecules (CAMs)                         | 237                                        | 1.255                 | 8.19E-04               |
|                       | hsa04724            | Glutamatergic synapse                                  | 231                                        | 1.220                 | 5.95E-03               |
|                       | hsa04360            | Axon guidance                                          | 229                                        | 2.071                 | 8.38E-06               |
|                       | hsa04713            | Circadian entrainment                                  | 208                                        | 2.083                 | 4.77E-06               |
|                       | hsa05166            | Human T-cell leukemia virus 1 infection                | 193                                        | -1.660                | 5.10E-05               |
|                       | hsa05032            | Morphine addiction                                     | 189                                        | 2.541                 | 1.45E-08               |
|                       | hsa04934            | Cushing syndrome                                       | 171                                        | 1.504                 | 3.23E-03               |
|                       | hsa04921            | Oxytocin signaling pathway                             | 167                                        | 1.445                 | 6.29E-03               |
|                       | hsa04020            | Calcium signaling pathway                              | 165                                        | 2.235                 | 8.79E-06               |
| <b>JHS (n= 1734)</b>  | hsa05032            | Morphine addiction                                     | 402                                        | 1.167                 | 9.84E-04               |
|                       | hsa04713            | Circadian entrainment                                  | 395                                        | 0.830                 | 2.73E-02               |
|                       | hsa04921            | Oxytocin signaling pathway                             | 372                                        | 0.798                 | 3.33E-02               |
|                       | hsa04020            | Calcium signaling pathway                              | 327                                        | 1.258                 | 8.01E-04               |
|                       | hsa04512            | ECM-receptor interaction                               | 317                                        | 1.032                 | 1.44E-02               |
|                       | hsa04727            | GABAergic synapse                                      | 282                                        | 1.093                 | 9.28E-03               |
|                       | hsa04934            | Cushing syndrome                                       | 249                                        | 1.370                 | 1.00E-03               |
|                       | hsa04014            | Ras signaling pathway                                  | 245                                        | 0.957                 | 3.90E-02               |
|                       | hsa05412            | Arrhythmogenic right ventricular cardiomyopathy (ARVC) | 227                                        | 1.690                 | 1.44E-04               |
|                       | hsa04261            | Adrenergic signaling in cardiomyocytes                 | 226                                        | 1.006                 | 2.95E-02               |

|                  |          |                                |    |        |          |
|------------------|----------|--------------------------------|----|--------|----------|
|                  | hsa04360 | Axon guidance                  | 59 | 0.319  | 9.06E-01 |
|                  | hsa04713 | Circadian entrainment          | 52 | 0.226  | 9.06E-01 |
|                  | hsa05224 | Breast cancer                  | 46 | 0.586  | 8.45E-01 |
|                  | hsa05165 | Human papillomavirus infection | 45 | 2.202  | 3.04E-01 |
| <b>PEG 1</b>     | hsa05032 | Morphine addiction             | 44 | 0.182  | 9.21E-01 |
| <b>(n = 237)</b> | hsa05226 | Gastric cancer                 | 44 | 0.868  | 7.78E-01 |
|                  | hsa04934 | Cushing syndrome               | 43 | 0.907  | 7.78E-01 |
|                  | hsa04390 | Hippo signaling pathway        | 39 | 0.916  | 7.78E-01 |
|                  | hsa04724 | Glutamatergic synapse          | 39 | 1.630  | 5.97E-01 |
|                  | hsa04015 | Rap1 signaling pathway         | 37 | -0.390 | 8.94E-01 |

\* Age acceleration residual as dependent variable, significant enrichment as independent variable, adjusted for nlog(EML)

**Supplementary Table 13. Top SEMs enriched KEGG pathways significantly associated with faster AgeAccelHannum**

|                                  | KEGG Pathway | Description                                            | Number of people with SEMs enriched | AgeAccel_Coeff* | AgeAccel_Pvalue |
|----------------------------------|--------------|--------------------------------------------------------|-------------------------------------|-----------------|-----------------|
| <b>FHS</b><br><b>(n = 2326)</b>  | hsa05165     | Human papillomavirus infection                         | 355                                 | 1.143           | 1.14E-03        |
|                                  | hsa04360     | Axon guidance                                          | 347                                 | 0.792           | 3.98E-02        |
|                                  | hsa05032     | Morphine addiction                                     | 346                                 | 2.222           | 1.67E-12        |
|                                  | hsa04713     | Circadian entrainment                                  | 341                                 | 1.959           | 2.24E-09        |
|                                  | hsa05033     | Nicotine addiction                                     | 339                                 | 2.083           | 1.69E-11        |
|                                  | hsa04510     | Focal adhesion                                         | 332                                 | 1.074           | 3.35E-03        |
|                                  | hsa04080     | Neuroactive ligand-receptor interaction                | 326                                 | 2.262           | 1.13E-12        |
|                                  | hsa04724     | Glutamatergic synapse                                  | 300                                 | 2.029           | 1.84E-09        |
|                                  | hsa04934     | Cushing syndrome                                       | 297                                 | 2.283           | 1.57E-10        |
|                                  | hsa00053     | Ascorbate and aldarate metabolism                      | 296                                 | 0.917           | 5.61E-03        |
| <b>WHI</b><br><b>(n= 2091)</b>   | hsa04724     | Glutamatergic synapse                                  | 231                                 | 1.461           | 5.59E-04        |
|                                  | hsa04360     | Axon guidance                                          | 229                                 | 1.477           | 1.19E-03        |
|                                  | hsa04713     | Circadian entrainment                                  | 208                                 | 1.987           | 7.57E-06        |
|                                  | hsa05166     | Human T-cell leukemia virus 1 infection                | 193                                 | -1.133          | 5.13E-03        |
|                                  | hsa05032     | Morphine addiction                                     | 189                                 | 2.373           | 5.72E-08        |
|                                  | hsa04934     | Cushing syndrome                                       | 171                                 | 2.160           | 9.38E-06        |
|                                  | hsa04921     | Oxytocin signaling pathway                             | 167                                 | 1.330           | 9.42E-03        |
|                                  | hsa04020     | Calcium signaling pathway                              | 165                                 | 1.844           | 1.77E-04        |
|                                  | hsa04510     | Focal adhesion                                         | 145                                 | -1.175          | 4.02E-02        |
|                                  | hsa04024     | cAMP signaling pathway                                 | 137                                 | 2.147           | 3.52E-05        |
| <b>JHS</b><br><b>(n= 1734)</b>   | hsa04360     | Axon guidance                                          | 451                                 | 0.630           | 3.43E-02        |
|                                  | hsa05032     | Morphine addiction                                     | 402                                 | 0.927           | 5.24E-04        |
|                                  | hsa04713     | Circadian entrainment                                  | 395                                 | 0.582           | 3.85E-02        |
|                                  | hsa04020     | Calcium signaling pathway                              | 327                                 | 0.898           | 1.62E-03        |
|                                  | hsa04512     | ECM-receptor interaction                               | 317                                 | 0.841           | 6.33E-03        |
|                                  | hsa04727     | GABAergic synapse                                      | 282                                 | 1.503           | 4.07E-08        |
|                                  | hsa05165     | Human papillomavirus infection                         | 277                                 | 0.685           | 3.43E-02        |
|                                  | hsa04934     | Cushing syndrome                                       | 249                                 | 1.445           | 9.84E-07        |
|                                  | hsa04024     | cAMP signaling pathway                                 | 239                                 | 0.906           | 7.88E-03        |
|                                  | hsa05412     | Arrhythmogenic right ventricular cardiomyopathy (ARVC) | 227                                 | 0.865           | 1.91E-02        |
| <b>PEG 1</b><br><b>(n = 237)</b> | hsa04360     | Axon guidance                                          | 59                                  | 0.418           | 8.86E-01        |
|                                  | hsa04713     | Circadian entrainment                                  | 52                                  | 1.182           | 7.74E-01        |
|                                  | hsa05224     | Breast cancer                                          | 46                                  | -0.554          | 8.86E-01        |
|                                  | hsa05165     | Human papillomavirus infection                         | 45                                  | 0.654           | 8.68E-01        |
|                                  | hsa05032     | Morphine addiction                                     | 44                                  | 0.060           | 9.81E-01        |
|                                  | hsa05226     | Gastric cancer                                         | 44                                  | 0.345           | 8.86E-01        |
|                                  | hsa04934     | Cushing syndrome                                       | 43                                  | 0.820           | 8.66E-01        |

|          |                         |    |        |          |
|----------|-------------------------|----|--------|----------|
| hsa04390 | Hippo signaling pathway | 39 | 0.524  | 8.86E-01 |
| hsa04724 | Glutamatergic synapse   | 39 | 1.877  | 6.22E-01 |
| hsa04015 | Rap1 signaling pathway  | 37 | -0.117 | 9.61E-01 |

\* Age acceleration residual as dependent variable, significant enrichment as independent variable, adjusted for nlog(EML)

**Supplementary Table 14. Top SEMs enriched KEGG pathways significantly associated with faster IEAA.**

|                           | KEGG Pathway | Description                                            | Number of people with SEMs enriched | AgeAccel_Coeff* | AgeAccel_Pvalue |
|---------------------------|--------------|--------------------------------------------------------|-------------------------------------|-----------------|-----------------|
| <b>FHS</b><br>(n = 2326)  | hsa05165     | Human papillomavirus infection                         | 355                                 | 0.887           | 2.56E-02        |
|                           | hsa05032     | Morphine addiction                                     | 346                                 | 1.055           | 3.76E-03        |
|                           | hsa04713     | Circadian entrainment                                  | 341                                 | 0.939           | 1.50E-02        |
|                           | hsa05033     | Nicotine addiction                                     | 339                                 | 1.560           | 3.24E-06        |
|                           | hsa04080     | Neuroactive ligand-receptor interaction                | 326                                 | 1.678           | 1.16E-06        |
|                           | hsa04724     | Glutamatergic synapse                                  | 300                                 | 1.392           | 2.08E-04        |
|                           | hsa04934     | Cushing syndrome                                       | 297                                 | 1.055           | 1.22E-02        |
|                           | hsa04727     | GABAergic synapse                                      | 294                                 | 1.400           | 2.06E-04        |
|                           | hsa04020     | Calcium signaling pathway                              | 292                                 | 1.850           | 7.65E-07        |
|                           | hsa05224     | Breast cancer                                          | 291                                 | 1.021           | 1.53E-02        |
| <b>WHI</b><br>(n= 2091)   | hsa04724     | Glutamatergic synapse                                  | 231                                 | 1.048           | 1.74E-02        |
|                           | hsa04360     | Axon guidance                                          | 229                                 | 1.439           | 2.09E-03        |
|                           | hsa04713     | Circadian entrainment                                  | 208                                 | 1.645           | 2.88E-04        |
|                           | hsa05166     | Human T-cell leukemia virus 1 infection                | 193                                 | -1.187          | 4.08E-03        |
|                           | hsa05032     | Morphine addiction                                     | 189                                 | 2.108           | 3.21E-06        |
|                           | hsa04921     | Oxytocin signaling pathway                             | 167                                 | 1.072           | 4.54E-02        |
|                           | hsa04020     | Calcium signaling pathway                              | 165                                 | 1.789           | 3.44E-04        |
|                           | hsa04015     | Rap1 signaling pathway                                 | 163                                 | 1.306           | 1.63E-02        |
|                           | hsa04024     | cAMP signaling pathway                                 | 137                                 | 2.296           | 1.60E-05        |
|                           | hsa05033     | Nicotine addiction                                     | 135                                 | 2.201           | 1.11E-05        |
| <b>JHS</b><br>(n= 1734)   | hsa05032     | Morphine addiction                                     | 402                                 | 0.884           | 3.66E-02        |
|                           | hsa04934     | Cushing syndrome                                       | 249                                 | 1.005           | 4.40E-02        |
|                           | hsa05412     | Arrhythmogenic right ventricular cardiomyopathy (ARVC) | 227                                 | 1.322           | 8.85E-03        |
|                           | hsa05033     | Nicotine addiction                                     | 222                                 | 1.367           | 3.57E-03        |
|                           | hsa05226     | Gastric cancer                                         | 166                                 | 1.293           | 2.91E-02        |
|                           | hsa04080     | Neuroactive ligand-receptor interaction                | 164                                 | 2.127           | 2.41E-05        |
|                           | hsa05414     | Dilated cardiomyopathy (DCM)                           | 155                                 | 1.893           | 2.23E-04        |
|                           | hsa04721     | Synaptic vesicle cycle                                 | 115                                 | 2.110           | 2.54E-04        |
|                           | hsa05410     | Hypertrophic cardiomyopathy (HCM)                      | 108                                 | 2.627           | 1.26E-05        |
|                           | hsa04950     | Maturity onset diabetes of the young                   | 81                                  | 1.958           | 8.00E-03        |
| <b>PEG 1</b><br>(n = 237) | hsa04360     | Axon guidance                                          | 59                                  | -0.324          | 9.32E-01        |
|                           | hsa04713     | Circadian entrainment                                  | 52                                  | -0.461          | 9.10E-01        |
|                           | hsa05224     | Breast cancer                                          | 46                                  | -0.076          | 9.81E-01        |
|                           | hsa05165     | Human papillomavirus infection                         | 45                                  | 2.479           | 1.66E-01        |
|                           | hsa05032     | Morphine addiction                                     | 44                                  | -0.302          | 9.32E-01        |
|                           | hsa05226     | Gastric cancer                                         | 44                                  | 0.063           | 9.81E-01        |
|                           | hsa04934     | Cushing syndrome                                       | 43                                  | 0.413           | 9.32E-01        |
|                           | hsa04390     | Hippo signaling pathway                                | 39                                  | 0.472           | 9.10E-01        |
|                           | hsa04724     | Glutamatergic synapse                                  | 39                                  | 1.412           | 7.33E-01        |
|                           | hsa04015     | Rap1 signaling pathway                                 | 37                                  | -1.111          | 8.06E-01        |

\* Age acceleration residual as dependent variable, significant enrichment as independent variable, adjusted for nlog(EML)



**Supplementary Table 15. Top SEMs enriched KEGG pathways significantly associated with faster AgeAccelGrim.**

|                           | <b>KEGG Pathway</b> | <b>Description</b>                                       | <b>Number of people with SEMs enriched</b> | <b>AgeAccel_Coeff*</b> | <b>AgeAccel_Pvalue</b> |
|---------------------------|---------------------|----------------------------------------------------------|--------------------------------------------|------------------------|------------------------|
| <b>FHS</b><br>(n = 2326)  | hsa04360            | Axon guidance                                            | 347                                        | -0.798                 | 4.97E-02               |
|                           | hsa04510            | Focal adhesion                                           | 332                                        | -0.855                 | 3.24E-02               |
|                           | hsa04080            | Neuroactive ligand-receptor interaction                  | 326                                        | -0.742                 | 4.31E-02               |
|                           | hsa04390            | Hippo signaling pathway                                  | 284                                        | -1.431                 | 5.72E-04               |
|                           | hsa04151            | PI3K-Akt signaling pathway                               | 265                                        | -0.956                 | 2.56E-02               |
|                           | hsa05205            | Proteoglycans in cancer                                  | 263                                        | -1.454                 | 8.02E-04               |
|                           | hsa05226            | Gastric cancer                                           | 256                                        | -1.399                 | 1.04E-03               |
|                           | hsa04512            | ECM-receptor interaction                                 | 252                                        | -0.865                 | 3.81E-02               |
|                           | hsa04550            | Signaling pathways regulating pluripotency of stem cells | 249                                        | -1.598                 | 1.57E-04               |
|                           | hsa04010            | MAPK signaling pathway                                   | 240                                        | -1.168                 | 9.80E-03               |
| <b>WHI</b><br>(n= 2091)   | hsa04510            | Focal adhesion                                           | 145                                        | -1.069                 | 2.69E-02               |
|                           | hsa04010            | MAPK signaling pathway                                   | 135                                        | -1.251                 | 1.37E-02               |
|                           | hsa05033            | Nicotine addiction                                       | 135                                        | 0.969                  | 2.45E-02               |
|                           | hsa04080            | Neuroactive ligand-receptor interaction                  | 130                                        | 1.157                  | 8.32E-03               |
|                           | hsa04072            | Phospholipase D signaling pathway                        | 129                                        | -1.556                 | 1.20E-03               |
|                           | hsa04310            | Wnt signaling pathway                                    | 117                                        | -1.251                 | 1.72E-02               |
|                           | hsa04152            | AMPK signaling pathway                                   | 111                                        | -1.792                 | 4.40E-04               |
|                           | hsa04911            | Insulin secretion                                        | 102                                        | 1.178                  | 1.86E-02               |
|                           | hsa04014            | Ras signaling pathway                                    | 95                                         | -1.463                 | 1.03E-02               |
|                           | hsa04144            | Endocytosis                                              | 91                                         | -1.763                 | 1.12E-03               |
| <b>JHS</b><br>(n= 1734)   | hsa04724            | Glutamatergic synapse                                    | 573                                        | -0.148                 | 9.05E-01               |
|                           | hsa04360            | Axon guidance                                            | 451                                        | 0.254                  | 8.92E-01               |
|                           | hsa04725            | Cholinergic synapse                                      | 437                                        | 0.164                  | 9.05E-01               |
|                           | hsa04510            | Focal adhesion                                           | 413                                        | -0.163                 | 9.07E-01               |
|                           | hsa05032            | Morphine addiction                                       | 402                                        | 0.352                  | 7.97E-01               |
|                           | hsa00053            | Ascorbate and aldarate metabolism                        | 400                                        | 0.093                  | 9.38E-01               |
|                           | hsa04713            | Circadian entrainment                                    | 395                                        | 0.240                  | 8.92E-01               |
|                           | hsa04015            | Rap1 signaling pathway                                   | 391                                        | 0.228                  | 8.95E-01               |
|                           | hsa00040            | Pentose and glucuronate interconversions                 | 374                                        | -0.038                 | 9.62E-01               |
|                           | hsa04080            | Neuroactive ligand-receptor interaction                  | 164                                        | 1.793                  | 9.56E-03               |
| <b>PEG 1</b><br>(n = 237) | hsa04360            | Axon guidance                                            | 59                                         | -0.468                 | 9.20E-01               |
|                           | hsa04713            | Circadian entrainment                                    | 52                                         | -0.521                 | 9.20E-01               |
|                           | hsa05224            | Breast cancer                                            | 46                                         | -2.263                 | 4.84E-01               |
|                           | hsa05165            | Human papillomavirus infection                           | 45                                         | -1.114                 | 8.36E-01               |
|                           | hsa05032            | Morphine addiction                                       | 44                                         | -0.895                 | 9.20E-01               |
|                           | hsa05226            | Gastric cancer                                           | 44                                         | -1.497                 | 6.67E-01               |
|                           | hsa04934            | Cushing syndrome                                         | 43                                         | 0.378                  | 9.20E-01               |
|                           | hsa04390            | Hippo signaling pathway                                  | 39                                         | -0.786                 | 9.20E-01               |
|                           | hsa04724            | Glutamatergic synapse                                    | 39                                         | 0.526                  | 9.20E-01               |
|                           | hsa04015            | Rap1 signaling pathway                                   | 37                                         | -1.882                 | 6.67E-01               |

\* Age acceleration residual as dependent variable, significant enrichment as independent variable, adjusted for nlog(EML)

**Supplementary Table 16. Top SEMs enriched KEGG pathways significantly associated with faster AgeAccelPheno.**

|                           | <b>KEGG Pathway</b>                          | <b>Description</b>                       | <b>Number of people with AgeAccel_C SEMs enriched</b> | <b>AgeAccel_Pv oef*</b> | <b>alue</b> |
|---------------------------|----------------------------------------------|------------------------------------------|-------------------------------------------------------|-------------------------|-------------|
| <b>FHS</b><br>(n = 2326)  | hsa05165                                     | Human papillomavirus infection           | 355                                                   | 0.003                   | 1.00E+00    |
|                           | hsa04360                                     | Axon guidance                            | 347                                                   | -1.074                  | 2.14E-01    |
|                           | hsa05032                                     | Morphine addiction                       | 346                                                   | 0.409                   | 8.14E-01    |
|                           | hsa04713                                     | Circadian entrainment                    | 341                                                   | 0.078                   | 9.62E-01    |
|                           | hsa05033                                     | Nicotine addiction                       | 339                                                   | 0.300                   | 8.43E-01    |
|                           | hsa04510                                     | Focal adhesion                           | 332                                                   | 0.049                   | 9.74E-01    |
|                           | hsa04080                                     | Neuroactive ligand-receptor interaction  | 326                                                   | 0.120                   | 9.13E-01    |
|                           | hsa04724                                     | Glutamatergic synapse                    | 300                                                   | -0.022                  | 9.84E-01    |
|                           | hsa04934                                     | Cushing syndrome                         | 297                                                   | -0.255                  | 8.99E-01    |
| hsa00053                  | Ascorbate and aldarate metabolism            | 296                                      | 0.168                                                 | 9.02E-01                |             |
| <b>WHI</b><br>(n= 2091)   | hsa04940                                     | Type I diabetes mellitus                 | 493                                                   | -0.525                  | 4.15E-01    |
|                           | hsa05330                                     | Allograft rejection                      | 337                                                   | -0.167                  | 8.74E-01    |
|                           | hsa05332                                     | Graft-versus-host disease                | 313                                                   | -0.344                  | 6.60E-01    |
|                           | hsa00053                                     | Ascorbate and aldarate metabolism        | 312                                                   | 0.285                   | 7.38E-01    |
|                           | hsa00040                                     | Pentose and glucuronate interconversions | 305                                                   | 0.127                   | 9.19E-01    |
|                           | hsa05416                                     | Viral myocarditis                        | 299                                                   | -0.086                  | 9.67E-01    |
|                           | hsa00860                                     | Porphyryn and chlorophyll metabolism     | 272                                                   | 0.048                   | 9.81E-01    |
|                           | hsa05320                                     | Autoimmune thyroid disease               | 272                                                   | -0.228                  | 8.32E-01    |
|                           | hsa04612                                     | Antigen processing and presentation      | 257                                                   | -0.228                  | 8.32E-01    |
| hsa00980                  | Metabolism of xenobiotics by cytochrome P450 | 253                                      | -0.017                                                | 9.88E-01                |             |
| <b>JHS</b><br>(n= 1734)   | hsa04724                                     | Glutamatergic synapse                    | 573                                                   | 0.029                   | 9.58E-01    |
|                           | hsa04360                                     | Axon guidance                            | 451                                                   | 0.290                   | 8.08E-01    |
|                           | hsa04725                                     | Cholinergic synapse                      | 437                                                   | 0.150                   | 8.98E-01    |
|                           | hsa04510                                     | Focal adhesion                           | 413                                                   | -0.604                  | 5.25E-01    |
|                           | hsa05032                                     | Morphine addiction                       | 402                                                   | 0.785                   | 3.30E-01    |
|                           | hsa00053                                     | Ascorbate and aldarate metabolism        | 400                                                   | 0.464                   | 5.82E-01    |
|                           | hsa04713                                     | Circadian entrainment                    | 395                                                   | 1.052                   | 1.57E-01    |
|                           | hsa04080                                     | Neuroactive ligand-receptor interaction  | 164                                                   | 2.014                   | 3.77E-02    |
|                           | hsa05414                                     | Dilated cardiomyopathy (DCM)             | 155                                                   | 2.054                   | 3.77E-02    |
| hsa05410                  | Hypertrophic cardiomyopathy (HCM)            | 108                                      | 2.306                                                 | 4.22E-02                |             |
| <b>PEG 1</b><br>(n = 237) | hsa04360                                     | Axon guidance                            | 59                                                    | -0.606                  | 9.29E-01    |
|                           | hsa04713                                     | Circadian entrainment                    | 52                                                    | 0.351                   | 9.53E-01    |
|                           | hsa05224                                     | Breast cancer                            | 46                                                    | -1.177                  | 9.29E-01    |
|                           | hsa05165                                     | Human papillomavirus infection           | 45                                                    | 0.292                   | 9.62E-01    |
|                           | hsa05032                                     | Morphine addiction                       | 44                                                    | -0.684                  | 9.29E-01    |
|                           | hsa05226                                     | Gastric cancer                           | 44                                                    | 0.589                   | 9.29E-01    |
|                           | hsa04934                                     | Cushing syndrome                         | 43                                                    | 0.075                   | 9.86E-01    |
|                           | hsa04390                                     | Hippo signaling pathway                  | 39                                                    | -2.425                  | 7.03E-01    |
|                           | hsa04724                                     | Glutamatergic synapse                    | 39                                                    | 1.064                   | 9.29E-01    |
| hsa04015                  | Rap1 signaling pathway                       | 37                                       | -0.464                                                | 9.29E-01                |             |

\* Age acceleration residual as dependent variable, significant enrichment as independent variable, adjusted for nlog(SEM)

**Supplementary Table 17. Association between Clock region-specific EML and corresponding DNAm AgeAccel.**

| Outcome = log(clock EML)<br>Model*     | PEG 1 (n = 237) |          | FHS (n = 2326) |          | WHI (n= 2091) |          | JHS (n= 1734) |          |
|----------------------------------------|-----------------|----------|----------------|----------|---------------|----------|---------------|----------|
|                                        | Bicor r         | P_value  | Bicor r        | P_value  | Bicor r       | P_value  | Bicor r       | P_value  |
| HorvathClock (353 CpGs) v. AgeAccel    | 0.008           | 9.07E-01 | 0.020          | 8.35E-01 | 0.034         | 1.23E-01 | 0.180         | 4.16E-14 |
| PhenoClock (513 CpGs) v. AgeAccelPheno | 0.008           | 9.03E-01 | 0.013          | 5.29E-01 | 0.058         | 8.26E-03 | 0.064         | 7.57E-03 |
| HannumClock (71CpGs) v. AgeAccelHannum | 0.071           | 2.77E-01 | -0.030         | 1.51E-01 | 0.017         | 4.28E-01 | 0.044         | 6.84E-02 |

\* Adjusted for Age, Sex, Cell types, Race/ethnicity, Log(total EML)

**Supplementary Table 18. Biweight midcorrelation analysis of regulatory region-specific EML in JHS.**

| Outcome = log(Region EML)* | Enhancer (CpGs = 26395) |          | DNase (CpGs = 466862) |          | Open Chromatin (CpGs = 108758) |          | TFBS (CpGs = 122647) |          | Promoter (CpGs = 110008) |          |
|----------------------------|-------------------------|----------|-----------------------|----------|--------------------------------|----------|----------------------|----------|--------------------------|----------|
|                            | Bicor r                 | P_value  | Bicor r               | P_value  | Bicor r                        | P_value  | Bicor r              | P_value  | Bicor r                  | P_value  |
| Age                        | -0.045                  | 6.01E-02 | 0.169                 | 1.24E-12 | 0.019                          | 4.34E-01 | -0.065               | 7.11E-03 | -0.027                   | 2.58E-01 |
| DNAm Age Acceleration      |                         |          |                       |          |                                |          |                      |          |                          |          |
| AgeAccelHorvath            | -0.027                  | 2.66E-01 | 0.129                 | 6.75E-08 | 0.026                          | 2.73E-01 | -0.012               | 6.14E-01 | -0.003                   | 8.94E-01 |
| IEAA                       | -0.027                  | 2.64E-01 | 0.132                 | 3.26E-08 | 0.025                          | 3.04E-01 | -0.023               | 3.34E-01 | -0.002                   | 9.32E-01 |
| AgeAccelHannum             | -0.059                  | 1.36E-02 | 0.236                 | 2.08E-23 | 0.002                          | 9.26E-01 | -0.089               | 1.94E-04 | -0.029                   | 2.35E-01 |
| AgeAccelGrim               | 0.022                   | 3.66E-01 | 0.098                 | 4.01E-05 | 0.018                          | 4.56E-01 | -0.038               | 1.17E-01 | -0.013                   | 5.99E-01 |
| Cell types                 |                         |          |                       |          |                                |          |                      |          |                          |          |
| CD8.naive                  | -0.004                  | 8.69E-01 | -0.101                | 2.40E-05 | 0.029                          | 2.20E-01 | 0.027                | 2.67E-01 | -0.029                   | 2.23E-01 |
| CD8pCD28nCD45RAn           | 0.016                   | 5.10E-01 | 0.073                 | 2.33E-03 | -0.004                         | 8.57E-01 | -0.024               | 3.21E-01 | 0.038                    | 1.12E-01 |
| PlasmaBlast                | -0.020                  | 3.98E-01 | -0.011                | 6.41E-01 | 0.038                          | 1.11E-01 | 0.016                | 4.99E-01 | -0.040                   | 9.44E-02 |
| CD4T                       | -0.012                  | 6.05E-01 | -0.090                | 1.79E-04 | 0.086                          | 3.33E-04 | 0.109                | 5.20E-06 | 0.016                    | 5.03E-01 |
| Gran                       | -0.067                  | 5.15E-03 | -0.181                | 3.39E-14 | 0.106                          | 8.95E-06 | 0.151                | 2.47E-10 | -0.049                   | 4.21E-02 |

\* Adjusted for Age, Sex, Cell types, Log(total EML).

**Supplementary Table 19. Biweight midcorrelation analysis of EML in FHS, stratified by the direction of SEM.**

| Outcome = log(EML)*              | All EML |          | Hypermethylated EML |          | Hypomethylated EML |          |
|----------------------------------|---------|----------|---------------------|----------|--------------------|----------|
|                                  | Bicor r | P_value  | Bicor r             | P_value  | Bicor r            | P_value  |
| Age                              | 0.244   | 7.15E-33 | 0.271               | 1.81E-40 | 0.139              | 1.53E-11 |
| BMI                              | 0.017   | 4.23E-01 | 0.016               | 4.49E-01 | 0.012              | 5.53E-01 |
| DNAm Age Acceleration            |         |          |                     |          |                    |          |
| AgeAccelHorvath                  | 0.106   | 3.11E-07 | 0.101               | 1.19E-06 | 0.092              | 9.46E-06 |
| IEAA                             | 0.109   | 1.26E-07 | 0.100               | 1.34E-06 | 0.107              | 2.22E-07 |
| EEAA (Unadjusted for cell types) | 0.297   | 1.12E-48 | 0.268               | 1.20E-39 | 0.286              | 7.07E-45 |
| AgeAccelHannum                   | 0.225   | 4.12E-28 | 0.225               | 3.85E-28 | 0.192              | 1.05E-20 |
| AgeAccelGrim                     | 0.173   | 3.74E-17 | 0.167               | 5.80E-16 | 0.125              | 1.29E-09 |
| DNAmADMAdjAge                    | 0.121   | 4.58E-09 | 0.121               | 4.26E-09 | 0.076              | 2.62E-04 |
| DNAmB2MAdjAge                    | 0.189   | 4.69E-20 | 0.197               | 7.10E-22 | 0.088              | 2.26E-05 |
| DNAmCystatinCAdjAge              | 0.119   | 8.71E-09 | 0.125               | 1.39E-09 | 0.031              | 1.29E-01 |
| DNAmGDF15AdjAge                  | 0.167   | 6.09E-16 | 0.181               | 1.58E-18 | 0.093              | 7.75E-06 |
| DNAmLeptinAdjAge                 | -0.021  | 3.19E-01 | -0.003              | 8.74E-01 | -0.047             | 2.23E-02 |
| DNAmPACKYRSAdjAge                | 0.166   | 7.99E-16 | 0.142               | 5.10E-12 | 0.172              | 7.31E-17 |
| DNAmPAI1AdjAge                   | 0.024   | 2.49E-01 | 0.056               | 6.70E-03 | -0.053             | 1.12E-02 |
| DNAmTIMP1AdjAge                  | 0.070   | 7.04E-04 | 0.083               | 5.69E-05 | 0.021              | 3.06E-01 |
| AgeAccelPheno                    | 0.178   | 4.45E-18 | 0.168               | 3.52E-16 | 0.133              | 1.14E-10 |
| DNAmTLAdjAge                     | -0.080  | 1.17E-04 | -0.088              | 1.99E-05 | -0.057             | 5.93E-03 |

|                                                        |        |          |        |          |        |          |
|--------------------------------------------------------|--------|----------|--------|----------|--------|----------|
| DNA <sub>m</sub> Age <sub>SkinBloodClockAdjAge</sub>   | 0.102  | 8.32E-07 | 0.127  | 7.26E-10 | 0.044  | 3.36E-02 |
| Cell types                                             |        |          |        |          |        |          |
| CD8.naive                                              | -0.072 | 5.20E-04 | -0.071 | 5.91E-04 | -0.040 | 5.38E-02 |
| CD8 <sub>p</sub> CD28 <sub>n</sub> CD45 <sub>RAn</sub> | 0.085  | 3.90E-05 | 0.045  | 2.83E-02 | 0.104  | 5.07E-07 |
| PlasmaBlast                                            | -0.054 | 8.94E-03 | -0.043 | 3.92E-02 | -0.060 | 3.98E-03 |
| CD4T                                                   | -0.146 | 1.68E-12 | -0.138 | 2.08E-11 | -0.096 | 3.89E-06 |
| Gran                                                   | -0.075 | 2.72E-04 | -0.106 | 3.10E-07 | -0.017 | 4.15E-01 |

\* Adjusted for age, sex, cell types.

**Supplementary Table 20. FHS: Distribution of hype- and hypomethylated SEMs in relation to CpG island.**

|                 | Constantly Hypermethylated SEM * | Constantly Hypomethylated SEM ** |
|-----------------|----------------------------------|----------------------------------|
| <b>Open Sea</b> | 8403                             | 41533                            |
| <b>Island</b>   | 45807                            | 5366                             |
| <b>N_Shelf</b>  | 711                              | 5101                             |
| <b>N_Shore</b>  | 11205                            | 6769                             |
| <b>S_Shelf</b>  | 619                              | 4913                             |
| <b>S_Shore</b>  | 8483                             | 5233                             |

\* Constantly hypermethylated SEMs were defined as DNA methylation mutations identified in more than 10 participants that were greater than three times the IQR above the upper quartile of a given CpG.

\*\* Constantly hypomethylated SEMs were defined as DNA methylation mutations identified in more than 10 participants that were less than three times the IQR above the lower quartile of a given CpG.

**Supplementary Table 21. FHS: Distribution of hype- and hypomethylated SEMs in relation to genomic region.**

|                  | Constantly Hypermethylated SEM * | Constantly Hypomethylated SEM ** |
|------------------|----------------------------------|----------------------------------|
| <b>TSS1500</b>   | 11769                            | 5841                             |
| <b>TSS200</b>    | 13399                            | 1639                             |
| <b>5'UTR</b>     | 4536                             | 3350                             |
| <b>1st Exon</b>  | 2160                             | 628                              |
| <b>Gene body</b> | 12757                            | 26197                            |
| <b>3' UTR</b>    | 559                              | 3442                             |

\* Constantly hypermethylated SEMs were defined as DNA methylation mutations identified in more than 10 participants that were greater than three times the IQR above the upper quartile of a given CpG.

\*\* Constantly hypomethylated SEMs were defined as DNA methylation mutations identified in more than 10 participants that were less than three times the IQR above the lower quartile of a given CpG.

**Supplementary Table 22. Association between Shannon entropy and age, AgeAccel, EML.**

| Outcome =Entropy*                | FHS (n = 2326) |          | WHI (n= 2091) |          | JHS (n= 1734) |          | PEG 1 (n = 237) |          |
|----------------------------------|----------------|----------|---------------|----------|---------------|----------|-----------------|----------|
|                                  | Bicor r        | P_value  | Bicor r       | P_value  | Bicor r       | P_value  | Bicor r         | P_value  |
| Age                              | 0.001          | 9.55E-01 | 0.068         | 2.01E-03 | 0.071         | 2.92E-03 | 0.117           | 7.30E-02 |
| DNAm Age Acceleration            |                |          |               |          |               |          |                 |          |
| AgeAccelHorvath                  | 0.081          | 9.11E-05 | 0.160         | 1.76E-13 | -0.039        | 1.02E-01 | 0.006           | 9.22E-01 |
| IEAA                             | 0.035          | 9.02E-02 | 0.131         | 1.70E-09 | -0.052        | 3.16E-02 | 0.018           | 7.83E-01 |
| EEAA (Unadjusted for cell types) | 0.038          | 6.39E-02 | 0.090         | 3.60E-05 | 0.017         | 4.73E-01 | 0.123           | 5.93E-02 |
| AgeAccelHannum                   | 0.155          | 6.23E-14 | 0.136         | 4.60E-10 | 0.063         | 9.10E-03 | 0.096           | 1.41E-01 |
| AgeAccelGrim                     | 0.077          | 1.89E-04 | 0.228         | 3.86E-26 | 0.043         | 7.17E-02 | 0.164           | 1.14E-02 |
| DNAmADMAAdjAge                   | 0.001          | 9.62E-01 | 0.205         | 2.80E-21 | -0.022        | 3.49E-01 | 0.075           | 2.53E-01 |
| DNAmB2MAdjAge                    | 0.033          | 1.12E-01 | 0.057         | 9.76E-03 | -0.019        | 4.19E-01 | 0.157           | 1.59E-02 |
| DNAmCystatinCAdjAge              | 0.110          | 9.87E-08 | 0.422         | 5.62E-91 | 0.075         | 1.67E-03 | 0.200           | 1.93E-03 |
| DNAmGDF15AdjAge                  | 0.095          | 4.70E-06 | 0.226         | 1.53E-25 | 0.230         | 2.54E-22 | 0.076           | 2.45E-01 |
| DNAmLeptinAdjAge                 | -0.023         | 2.68E-01 | -0.060        | 6.11E-03 | 0.031         | 2.01E-01 | -0.034          | 6.05E-01 |
| DNAmPACKYRSAdjAge                | 0.091          | 1.17E-05 | 0.125         | 9.64E-09 | 0.054         | 2.46E-02 | 0.112           | 8.44E-02 |
| DNAmPAI1AdjAge                   | -0.036         | 8.02E-02 | 0.009         | 6.68E-01 | -0.007        | 7.78E-01 | 0.099           | 1.30E-01 |
| DNAmTIMP1AdjAge                  | 0.015          | 4.73E-01 | -0.041        | 5.96E-02 | -0.085        | 4.17E-04 | -0.113          | 8.17E-02 |
| AgeAccelPheno                    | 0.079          | 1.35E-04 | 0.069         | 1.68E-03 | -0.008        | 7.47E-01 | -0.018          | 7.88E-01 |
| DNAmTLAdjAge                     | 0.002          | 9.36E-01 | 0.042         | 5.41E-02 | 0.017         | 4.78E-01 | 0.010           | 8.80E-01 |
| DNAmAgeSkinBloodClockAdjAge      | -0.025         | 2.35E-01 | -0.063        | 4.18E-03 | -0.001        | 9.81E-01 | -0.072          | 2.67E-01 |
| SEM                              | 0.089          | 1.63E-05 | 0.294         | 6.87E-43 | 0.325         | 7.22E-44 | 0.281           | 1.10E-05 |

\* Adjusted for Age, Sex, Race/ethnicity, Cell types.
